# Supplementary material
Source: Springer Nature journal article supplement (https://www.springermedizin.de/resource/supplementary/12981_2010_179_MOESM3_ESM.pdf/9604046)

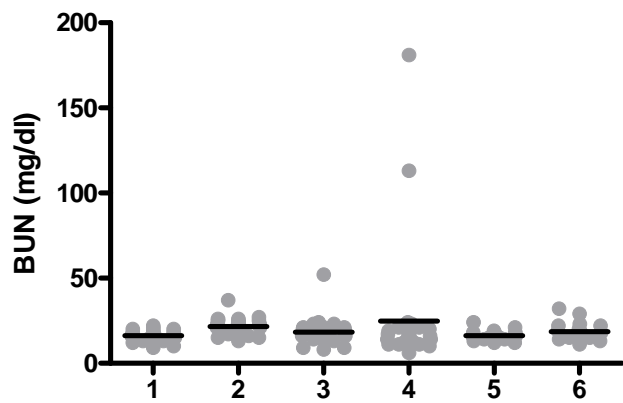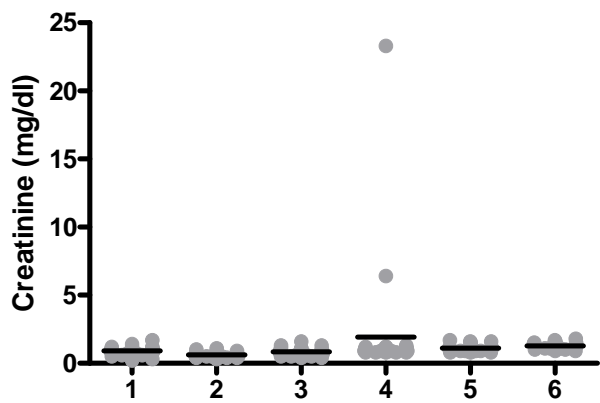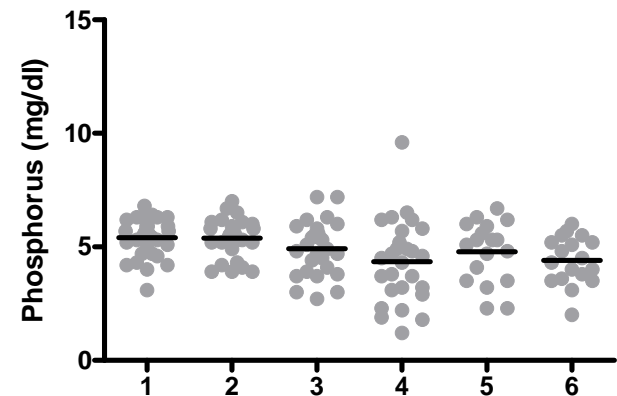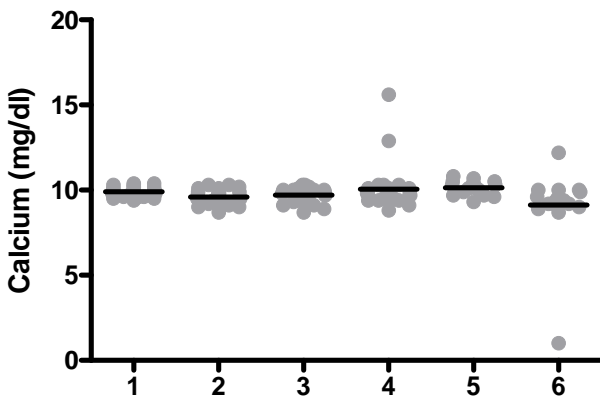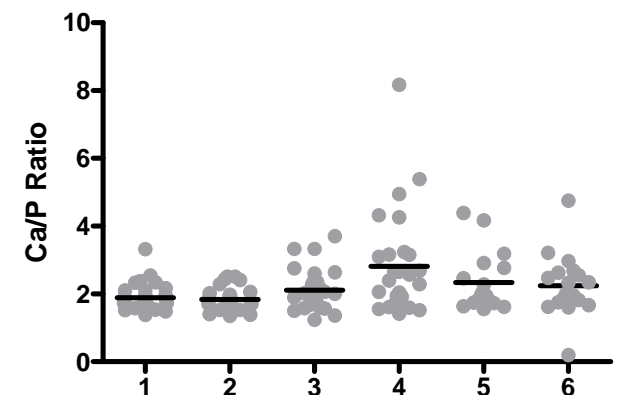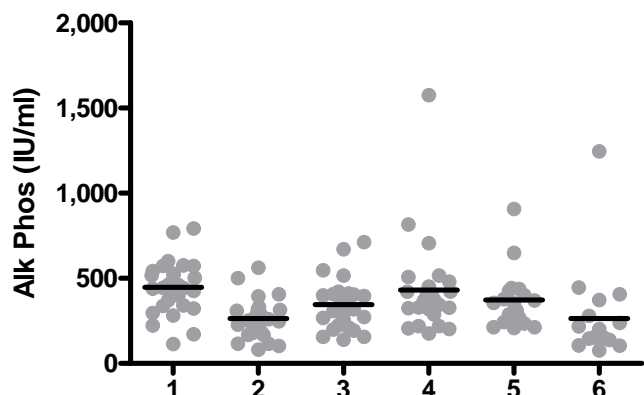

Supplement: MOESM3 [file 9604046]
